# Supplementary material for: Spironolactone Reduces Aortic Stiffness in Patients With Resistant Hypertension Independent of Blood Pressure Change
Source: PubMed Central journal article supplement — J Am Heart Assoc. 2021 Aug 28;10(17):e019434. doi: 10.1161/JAHA.120.019434 (PMC8649301; doi:10.1161/jaha.120.019434), 2021-08-28
Supplement: JAH3-10-e019434-s001.pdf [file JAH3-10-e019434-s001.pdf]

# **SUPPLEMENTAL MATERIAL**

**Table S1. Baseline characteristics of different groups of subjects enrolled in 6-month spironolactone treatment study.**

| Parameters                                 | Included in analysis<br>(n=30) | Not complete PC CMR<br>(n=5)* | Study not completed<br>(n=10)† | P-<br>Value |
|--------------------------------------------|--------------------------------|-------------------------------|--------------------------------|-------------|
| <b>Demographics</b>                        |                                |                               |                                |             |
| Age (Years)                                | 53.6±6.7                       | 55.8±9.2                      | 57.4±8.3                       | 0.487       |
| Male                                       | 20 (66.7%)                     | 3 (80%)                       | 6 (60%)                        | 0.899       |
| African Americans                          | 19 (63.3%)                     | 2 (40%)                       | 5 (50%)                        | 0.478       |
| <b>Co-Morbidities</b>                      |                                |                               |                                |             |
| Hypertension Duration (Years)              | 20.9±10.7                      | 23.0±7.7                      | 14.5±11.4                      | 0.210       |
| Hyperaldosteronism                         | 18 (60.0%)                     | 2 (40%)                       | 8 (80%)                        | 0.358       |
| Obstructive Sleep Apnea                    | 20 (66.7%)                     | 4 (80%)                       | 5 (50%)                        | 0.572       |
| Diabetes                                   | 9 (30.0%)                      | 2 (40%)                       | 2 (20%)                        | 0.694       |
| Coronary Artery Disease                    | 1 (3.3%)                       | 0 (0%)                        | 1 (10%)                        | 0.561       |
| <b>Measurements</b>                        |                                |                               |                                |             |
| Body Mass Index (kg/m <sup>2</sup> )       | 32.9±4.8                       | 36.0±4.6                      | 38.5±7.7                       | 0.219       |
| Fat Percentage                             | 33.9±8.2                       | 34.7±11.2                     | 33.9±8.4                       | 0.351       |
| Neck (cm)                                  | 42.9±4.1                       | 42.4±2.5                      | 42.9±3.2                       | 0.958       |
| Waist (inch)                               | 42.8±5.0                       | 46.7±4.7                      | 43.7±3.6                       | 0.238       |
| <b>Biochemistry</b>                        |                                |                               |                                |             |
| Serum Creatinine (mg/dL)                   | 1.07±0.25                      | 1.14±0.44                     | 1.13±0.26                      | 0.743       |
| Serum Potassium (mMol/L)                   | 3.77±0.36                      | 3.70±0.23                     | 3.98±0.36                      | 0.214       |
| B-Type Natriuretic Peptide (pg/mL)         | 33.7±34.3                      | 34.0±49.0                     | 41.6±30.7                      | 0.824       |
| PAC (ng/dL)                                | 14.1±6.4                       | 15.6±7.5                      | 15.6±8.9                       | 0.783       |
| PRA (ng/mL/h)                              | 0.6 (0.6-1.0)                  | 2.3 (0.6-4.8)                 | 0.6 (0.6-0.6)                  | 0.062       |
| PAC/PRA Ratio                              | 21.7±19.5                      | 13.7±8.8                      | 25.0±14.7                      | 0.510       |
| 24-h Urine Aldosterone (µg)                | 16.0±7.4                       | 12.4±6.5                      | 18.3±9.7                       | 0.396       |
| 24-h Urine Protein (mg)                    | 346±769                        | 447±517                       | 287±141                        | 0.922       |
| 24-h Urine Cortisol (µg)                   | 151±76                         | 138±120                       | 163±85                         | 0.867       |
| 24-h Urine Sodium (mmol)                   | 194±75                         | 165±135                       | 157±55                         | 0.409       |
| 24-h Urine Potassium (mmol)                | 73.2±26.6                      | 63.6±32.7                     | 85.8±76.1                      | 0.602       |
| 24-h Urine Calculated Creatinine (mg)      | 1622±464                       | 1606±525                      | 1592±360                       | 0.982       |
| <b>Total Antihypertensive Medications*</b> | 4.4±1.2                        | 5.2±1.3                       | 5.1±0.9                        | 0.155       |

(to be continued)

**Table S1 (Continued).**

**Baseline characteristics of different groups of subjects enrolled in 6-month spironolactone treatment study.**

| <b>Parameters</b>                             | <b>Included in analysis<br/>(n=30)</b> | <b>Not complete PC CMR<br/>(n=5)*</b> | <b>Study not completed<br/>(n=10)†</b> | <b>P-<br/>Value</b> |
|-----------------------------------------------|----------------------------------------|---------------------------------------|----------------------------------------|---------------------|
| <b>Blood Pressure</b>                         |                                        |                                       |                                        |                     |
| Systolic Blood Pressure (mmHg)                | 142±17                                 | 137±9                                 | 153±13                                 | 0.109               |
| Diastolic Blood Pressure (mmHg)               | 83±12                                  | 83±11                                 | 88±11                                  | 0.559               |
| Pulse Pressure (mmHg)                         | 59.5±12.6                              | 53.8±12.3                             | 65.6±14.8                              | 0.236               |
| Mean Arterial Pressure (mmHg)                 | 103±13                                 | 101±9                                 | 109±9                                  | 0.259               |
| Heart Rate (beats/minute)                     | 68.5±12.2                              | 65.8±9.4                              | 64.5±9.6                               | 0.605               |
| <b>CMR LV Function</b>                        |                                        |                                       |                                        |                     |
| LVEF                                          | 65.4±6.4                               | 70.2±14.1                             | 64.7±8.5                               | 0.411               |
| LVEDVI                                        | 74.5±14.1                              | 58.0±15.1                             | 75.0±11.6                              | 0.048               |
| LVESVI                                        | 25.5±6.8                               | 17.2±8.2                              | 26.6±7.5                               | 0.046               |
| LVSVI                                         | 49.1±10.4                              | 40.9±13.3                             | 48.4±9.2                               | 0.271               |
| CO                                            | 7.1±1.6                                | 5.8±1.7                               | 6.8±0.8                                | 0.210               |
| <b>Estimates of Ascending Aorta Stiffness</b> |                                        |                                       |                                        |                     |
| Asc. Aorta Pulsatility, %                     | 15.9±5.3                               | -                                     | 14.5±5.7                               | 0.471               |
| Asc. Aorta Distensibility, %/mmHg             | 0.28±0.10                              | -                                     | 0.23±0.12                              | 0.255               |
| Asc. Aorta PWV, m/s                           | 6.3±2.3                                | -                                     | 5.5±1.7                                | 0.298               |

\*This group includes 5 subjects that did not complete phase-contact CMR study of Ascending Aorta flow either at baseline (n=1) or after 6-month spironolactone treatment (n=4).

†This group includes 10 subjects that did not complete study protocol due to various reasons as follows: due to spironolactone intolerance (n=1), increased creatinine (n=1), hyperkalemia (n=1), uncontrolled BP (n=3), in compliance to the study protocol (n=2), claustrophobia to CMR study (n=1), and voluntary withdraw for adrenal venous sampling and adrenalectomy (n=1).

Based on distribution of continuous variables, parametric or non-parametric, one-Way ANOVA or Kruskal-Wallis test was used to compare means or medians of baseline variables of 3 groups of subjects enrolled in the study. Proportions of categorical variables in the groups were compared using Fisher's Exact test.

**Table S2. Study subjects' demographic characteristics and CMR-related measurements of blood pressure, ascending aorta cross-section area, and pulse wave velocity.**

| Subjects       | Age, yrs.   | Race     | Sex      | Baseline   |           |                                       |                                       |            | 6-month of Spironolactone intake |           |                                       |                                       |            |
|----------------|-------------|----------|----------|------------|-----------|---------------------------------------|---------------------------------------|------------|----------------------------------|-----------|---------------------------------------|---------------------------------------|------------|
|                |             |          |          | SBP, mmHg  | DBP, mmHg | AscA <sub>max</sub> , mm <sup>2</sup> | AscA <sub>min</sub> , mm <sup>2</sup> | PWV, m/s   | SBP, mmHg                        | DBP, mmHg | AscA <sub>max</sub> , mm <sup>2</sup> | AscA <sub>min</sub> , mm <sup>2</sup> | PWV, m/s   |
| 1              | 55          | AA       | M        | 130        | 78.5      | 1292                                  | 1187                                  | 6          | 120.5                            | 71.5      | 1032                                  | 833.8                                 | 4.4        |
| 2              | 45          | AA       | M        | 154.5      | 92        | 808.7                                 | 643.2                                 | 3.2        | 144                              | 101.5     | 682.2                                 | 565.6                                 | 6.5        |
| 3              | 48          | W        | M        | 157        | 92        | 876.4                                 | 692.3                                 | 4.7        | 164                              | 85        | 754                                   | 576.4                                 | 2.5        |
| 4              | 58          | AA       | M        | 135        | 81.5      | 1086                                  | 971.6                                 | 5.1        | 126                              | 60.5      | 1056                                  | 960.8                                 | 5.2        |
| 5              | 61          | AA       | M        | 122        | 83.5      | 823.3                                 | 708.5                                 | 4.6        | 144                              | 95.5      | 1050                                  | 836                                   | 4.8        |
| 6              | 48          | W        | F        | 123        | 55        | 496.1                                 | 408.5                                 | 4          | 146                              | 75        | 586.6                                 | 420.2                                 | 3          |
| 7              | 52          | AA       | F        | 131        | 71        | 540.9                                 | 490.1                                 | 8          | 119.5                            | 64        | 680.3                                 | 526.9                                 | 7          |
| 8              | 45          | AA       | M        | 153        | 103.5     | 978.1                                 | 803.8                                 | 8.8        | 112                              | 79        | 1033                                  | 885.3                                 | 5.4        |
| 9              | 45          | W        | M        | 136        | 100.5     | 927.1                                 | 807.4                                 | 6.3        | 144.5                            | 93        | 995.1                                 | 850.6                                 | 4          |
| 10             | 47          | W        | M        | 124        | 80        | 1444                                  | 1215                                  | 4          | 135.5                            | 88.5      | 1328                                  | 1175                                  | 5          |
| 11             | 57          | AA       | M        | 138        | 77        | 727.4                                 | 595.2                                 | 4.8        | 132                              | 75        | 995.1                                 | 850.6                                 | 3.7        |
| 12             | 64          | AA       | F        | 180        | 92        | 451                                   | 382                                   | 5.4        | 192.5                            | 90.5      | 507.9                                 | 403.3                                 | 3.7        |
| 13             | 48          | AA       | M        | 128.5      | 67.5      | 886.4                                 | 736.4                                 | 7.7        | 125.5                            | 78.5      | 756.4                                 | 630.4                                 | 4.7        |
| 14             | 57          | AA       | M        | 157        | 104       | 1083                                  | 926                                   | 7.1        | 97.5                             | 63.5      | 887.5                                 | 786                                   | 6.5        |
| 15             | 47          | AA       | M        | 157.5      | 82.5      | 797.3                                 | 632                                   | 6.4        | 138                              | 79        | 795                                   | 591.4                                 | 3.9        |
| 16             | 65          | W        | M        | 153        | 94        | 843.2                                 | 779.7                                 | 10.6       | 104                              | 67        | 855.3                                 | 769.1                                 | 3.8        |
| 17             | 66          | AA       | F        | 164        | 89.5      | 549.9                                 | 488.8                                 | 7          | 136                              | 74        | 694.6                                 | 631.6                                 | 6.1        |
| 18             | 57          | W        | M        | 120        | 76        | 678.2                                 | 589                                   | 5.5        | 135                              | 68        | 897.6                                 | 709.9                                 | 3.45       |
| 19             | 49          | AA       | F        | 147        | 65        | 897.4                                 | 772.9                                 | 4.7        | 168.5                            | 78        | 994.3                                 | 829.6                                 | 3.1        |
| 20             | 51          | W        | F        | 134        | 84        | 464.4                                 | 391.5                                 | 3.1        | 122                              | 70        | 561                                   | 432.5                                 | 1.6        |
| 21             | 54          | W        | F        | 136        | 81        | 510.2                                 | 453                                   | 5.4        | 129                              | 82        | 589.2                                 | 479.5                                 | 3.5        |
| 22             | 48          | W        | F        | 142        | 77        | 793.2                                 | 684.9                                 | 4          | 143                              | 78        | 701.8                                 | 576.9                                 | 3.5        |
| 23             | 62          | W        | M        | 139        | 76        | 805.8                                 | 749.6                                 | 5.2        | 138                              | 71        | 807.1                                 | 705.7                                 | 4.9        |
| 24             | 49          | AA       | M        | 137.5      | 85.5      | 1076                                  | 933.9                                 | 2.5        | 159.5                            | 110.5     | 1100                                  | 876.4                                 | 4.2        |
| 25             | 57          | AA       | M        | 133        | 74        | 676.3                                 | 606.9                                 | 10.1       | 141                              | 84.5      | 718.5                                 | 602.9                                 | 10.5       |
| 26             | 57          | AA       | F        | 130        | 74        | 960                                   | 871.3                                 | 10.2       | 126                              | 77        | 1062.5                                | 843.2                                 | 5.5        |
| 27             | 65          | AA       | M        | 143.5      | 77        | 662.1                                 | 558.4                                 | 9.3        | 162                              | 97        | 650.3                                 | 514.2                                 | 3.2        |
| 28             | 56          | AA       | M        | 140        | 84.5      | 836.4                                 | 753.5                                 | 8.5        | 170                              | 117       | 1068                                  | 881                                   | 2          |
| 29             | 51          | W        | F        | 127.5      | 76        | 505.2                                 | 450.8                                 | 7.4        | 118.5                            | 65.5      | 614                                   | 445.9                                 | 2.9        |
| 30             | 45          | AA       | M        | 196        | 111       | 829.7                                 | 739.9                                 | 10         | 156.5                            | 93.5      | 684.7                                 | 604.1                                 | 6.2        |
| <i>Average</i> | <i>53.6</i> | <i>-</i> | <i>-</i> | <i>142</i> | <i>83</i> | <i>810</i>                            | <i>701</i>                            | <i>6.3</i> | <i>138</i>                       | <i>81</i> | <i>838</i>                            | <i>693</i>                            | <i>4.5</i> |
| <i>SD</i>      | <i>6.7</i>  | <i>-</i> | <i>-</i> | <i>17</i>  | <i>12</i> | <i>240</i>                            | <i>212</i>                            | <i>2.3</i> | <i>21</i>                        | <i>14</i> | <i>203</i>                            | <i>188</i>                            | <i>1.8</i> |

Age is at the time of study enrollment; AA= African American; W= Whites; M= male; F= female; SBP= systolic blood pressure; DBP= diastolic blood pressure; AscA<sub>max</sub>= maximum (systolic) area of the Ascending Aorta; AscA<sub>min</sub>= minimum (diastolic) area of the Ascending Aorta; PWV= pulse wave velocity.

**Table S3. Estimates of ascending aorta stiffness after 6-month of spironolactone treatments in subjects included in vs. excluded from the primary study analysis.**

| Parameters                                | Included in analysis<br>(n=30) |                       | Excluded from analysis<br>(n=15) |                       | T-test P-value                       |
|-------------------------------------------|--------------------------------|-----------------------|----------------------------------|-----------------------|--------------------------------------|
|                                           | Baseline<br>(n=30)             | 6-month SPL<br>(n=30) | Baseline<br>(n=11)*              | 6-month SPL<br>(n=4)† |                                      |
| Ascending Aorta Pulsatility, %            | 15.9±5.3                       | 22.1±7.9              | 13.8±5.9                         | 24.4±10.9             | 0.271 (unpaired)<br>0.584 (unpaired) |
| T-Test P-value                            | <0.001 (paired)                |                       | 0.027 (unpaired)                 |                       |                                      |
| Ascending Aorta Distensibility,<br>%/mmHg | 0.28±0.10                      | 0.40±0.14             | 0.23±0.11                        | 0.49±0.24             | 0.199 (unpaired)<br>0.272 (unpaired) |
| T-Test P-value                            | <0.001 (paired)                |                       | 0.012 (unpaired)                 |                       |                                      |
| Ascending Aorta PWV, m/s                  | 6.3±2.3                        | 4.5±1.8               | 5.4±1.7                          | 3.8±2.2               | 0.213 (unpaired)<br>0.481 (unpaired) |
| T-Test P-value                            | <0.001 (paired)                |                       | 0.166 (unpaired)                 |                       |                                      |

SPL=spironolactone.

\*This group includes subjects that had only baseline phase-contrast CMR study of ascending aorta flow (10 subjects that did not complete 6-month treatment study protocol and were withdrawn and 1 subject that did not have phase-contact CMR study after 6-month spironolactone treatment).

†This group includes 4 subjects that had only follow-up phase-contrast CMR study of ascending aorta flow (they completed the treatment study but did not have phase-contact CMR study of ascending aorta flow at baseline).

Depending on groups of comparison, paired or unpaired T-test was used as specified in the table.

## FIGURE S1

### Multivariable linear regression model (demographic variables).

#### Dependent variables:

**A)** difference in aortic pulsatility (d<sub>AP</sub>), **B)** difference in aortic distensibility (d<sub>AD</sub>), and **C)** difference in pulse wave velocity (d<sub>PWV</sub>).

where difference = value after 6 months of spironolactone intake – value at baseline

#### Independent variables:

Age, Sex, Race, HyperAldosteronism.

#### Collinearity Statistics for model with dependent variables d<sub>AP</sub>, d<sub>AD</sub>, or d<sub>PWV</sub>.

| Independent Variables | Tolerance | Variance inflation factor (VIF) |
|-----------------------|-----------|---------------------------------|
| Age                   | 0.962     | 1.04                            |
| Sex                   | 0.941     | 1.063                           |
| Race                  | 0.936     | 1.069                           |
| HyperAldosteronism    | 0.966     | 1.035                           |

#### A) Outcome = Difference in aortic pulsatility

| Parameter          | Beta Estimate | Standard Error | t Value | Pr >  t |
|--------------------|---------------|----------------|---------|---------|
| Intercept          | -5.703        | 11.591         | -0.492  | 0.627   |
| Age                | -0.123        | 0.206          | -0.596  | 0.556   |
| Sex                | 7.842         | 2.901          | 2.703   | 0.012   |
| Race               | -2.509        | 2.845          | -0.882  | 0.386   |
| HyperAldosteronism | 3.019         | 2.754          | 1.096   | 0.283   |

#### B) Outcome = Difference in aortic distensibility

| Parameter          | Beta Estimate | Standard Error | t Value | Pr >  t |
|--------------------|---------------|----------------|---------|---------|
| Intercept          | -0.238        | 0.225          | -1.061  | 0.299   |
| Age                | 0             | 0.004          | 0.051   | 0.96    |
| Sex                | 0.129         | 0.056          | 2.298   | 0.03    |
| Race               | 0.028         | 0.055          | 0.512   | 0.613   |
| HyperAldosteronism | 0.015         | 0.053          | 0.274   | 0.787   |

#### C) Outcome = difference in PWV

| Parameter          | Beta Estimate | Standard Error | t Value | Pr >  t |
|--------------------|---------------|----------------|---------|---------|
| Intercept          | -3.144        | 3.702          | -0.849  | 0.404   |
| Age                | 0.073         | 0.066          | 1.111   | 0.277   |
| Sex                | 0.166         | 0.927          | 0.179   | 0.859   |
| Race               | 0.379         | 0.909          | 0.417   | 0.681   |
| HyperAldosteronism | 1.352         | 0.88           | 1.536   | 0.137   |

Units of change in the predictor variables: Age (1 year), Sex (1 (M)/0 (F)), Race (1 (African American)/0 (White)), Hyperaldosteronism: (1 (yes)/0 (no)).

## FIGURE S2

### Multivariable linear regression model (basic cardiac function and hemodynamic variables).

#### Dependent variables:

**A)** difference in aortic pulsatility (d\_AP), **B)** difference in aortic distensibility (d\_AD), and **C)** difference in pulse wave velocity (d\_PWV).

#### Independent variables:

Difference in left ventricular ejection fraction (d\_LVEF), stroke volume (d\_SV), heart rate (d\_HR), mean arterial pressure (d\_MAP), and pulse pressure (d\_PP).

where difference = value after 6 months of spironolactone intake – value at baseline

#### Collinearity Statistics for model with dependent variables d\_AP, d\_AD, or d\_PWV.

| Independent Variables | Tolerance | Variance inflation factor (VIF) |
|-----------------------|-----------|---------------------------------|
| d_LVEF                | 0.49      | 2.04                            |
| d_SV                  | 0.431     | 2.323                           |
| d_HR                  | 0.708     | 1.413                           |
| d_MAP                 | 0.771     | 1.298                           |
| d_PP                  | 0.754     | 1.326                           |

#### A) Outcome = Difference in aortic pulsatility

| Parameter | Beta Estimate | Standard Error | t Value | Pr >  t |
|-----------|---------------|----------------|---------|---------|
| Intercept | -6.778        | 1.443          | -4.699  | 0.000   |
| d_LVEF    | 0.147         | 0.218          | 0.677   | 0.505   |
| d_SV      | 0.112         | 0.091          | 1.234   | 0.229   |
| d_HR      | 0.179         | 0.153          | 1.168   | 0.254   |
| d_MAP     | 0.095         | 0.086          | 1.096   | 0.284   |
| d_PP      | 0.069         | 0.128          | 0.535   | 0.597   |

#### B) Outcome = Difference in aortic distensibility

| Parameter | Beta Estimate | Standard Error | t Value | Pr >  t |
|-----------|---------------|----------------|---------|---------|
| Intercept | -0.122        | 0.027          | -4.442  | 0.000   |
| d_LVEF    | 0.002         | 0.004          | 0.380   | 0.707   |
| d_SV      | 0.002         | 0.002          | 1.233   | 0.229   |
| d_HR      | 0.003         | 0.003          | 0.988   | 0.333   |
| d_MAP     | 0.002         | 0.002          | 0.950   | 0.352   |
| d_PP      | -0.005        | 0.002          | -1.973  | 0.060   |

#### C) Outcome = difference in PWV

| Parameter | Beta Estimate | Standard Error | t Value | Pr >  t |
|-----------|---------------|----------------|---------|---------|
| Intercept | 1.416         | 0.419          | 3.378   | 0.002   |
| d_LVEF    | -0.129        | 0.063          | -2.035  | 0.053   |
| d_SV      | 0.023         | 0.026          | 0.887   | 0.384   |
| d_HR      | -0.066        | 0.044          | -1.477  | 0.153   |
| d_MAP     | -0.001        | 0.025          | -0.044  | 0.965   |
| d_PP      | 0.039         | 0.037          | 1.040   | 0.309   |

Units of change in the predictor variables: LVEF (1 %), SV (1 ml), HR (1 bpm), MAP (1 mmHg), PP (1 mmHg).

## FIGURE S3

### Multivariable linear regression model (biochemical variables).

#### Dependent variables:

**A)** difference in aortic pulsatility (d\_AP), **B)** difference in aortic distensibility (d\_AD), and **C)** difference in pulse wave velocity (d\_PWV).

#### Independent variables:

Difference in serum creatinine (d\_SCr), serum potassium (d\_SK+), plasma renin activity (d\_PRA), brain natriuretic peptide (d\_BNP).

where difference = value after 6 months of spironolactone intake – value at baseline

#### Collinearity Statistics for model with dependent variables d\_AP, d\_AD, or d\_PWV.

| Independent Variables | Tolerance | Variance inflation factor (VIF) |
|-----------------------|-----------|---------------------------------|
| d_SCr                 | 0.914     | 1.094                           |
| d_SK+                 | 0.981     | 1.02                            |
| d_PRA                 | 0.87      | 1.15                            |
| d_BNP                 | 0.925     | 1.081                           |

#### A) Outcome = Difference in aortic pulsatility

| Parameter | Beta Estimate | Standard Error | t Value | Pr >  t |
|-----------|---------------|----------------|---------|---------|
| Intercept | -8.546        | 2.735          | -3.125  | 0.005   |
| d_SCr     | 0.794         | 8.608          | 0.092   | 0.927   |
| d_SK+     | -1.334        | 3.528          | -0.378  | 0.709   |
| d_PRA     | -0.241        | 0.123          | -1.963  | 0.061   |
| d_BNP     | -0.009        | 0.106          | -0.082  | 0.936   |

#### B) Outcome = Difference in aortic distensibility

| Parameter | Beta Estimate | Standard Error | t Value | Pr >  t |
|-----------|---------------|----------------|---------|---------|
| Intercept | -0.123        | 0.05           | -2.457  | 0.022   |
| d_SCr     | -0.041        | 0.158          | -0.259  | 0.798   |
| d_SK+     | 0.003         | 0.065          | 0.051   | 0.960   |
| d_PRA     | -0.003        | 0.002          | -1.489  | 0.150   |
| d_BNP     | -0.002        | 0.002          | -1.181  | 0.249   |

#### C) Outcome = difference in PWV

| Parameter | Beta Estimate | Standard Error | t Value | Pr >  t |
|-----------|---------------|----------------|---------|---------|
| Intercept | 1.349         | 0.784          | 1.719   | 0.098   |
| d_SCr     | -3.192        | 2.469          | -1.293  | 0.208   |
| d_SK+     | 0.503         | 1.012          | 0.497   | 0.624   |
| d_PRA     | -0.014        | 0.035          | -0.404  | 0.690   |
| d_BNP     | 0.031         | 0.03           | 1.023   | 0.317   |

Units of change in the predictor variables: Scr (1 mg/dL), SK+ (1 mMol/L), PRA (1 ng/mL/h), BNP: (1 pg/mL).
